# Supplementary material for: PatJAZ6 Acts as a Repressor Regulating JA-Induced Biosynthesis of Patchouli Alcohol in Pogostemon Cablin
Source: PubMed Central journal article supplement (PMC6928788; doi:10.3390/ijms20236038), 2019-11-30
Supplement: ijms-20-06038-s001.pdf [file ijms-20-06038-s001.pdf]

# *PatJAZ6* acts as a repressor regulating JA-induced biosynthesis of patchouli alcohol in *Pogostemon cablin*

Xiaobing Wang<sup>1</sup>, Xiuzhen Chen<sup>1</sup>, Liting Zhong<sup>1</sup>, Xuanxuan Zhou<sup>1</sup>, Yun Tang<sup>1</sup>, Yanting Liu<sup>1</sup>, Junren Li<sup>1</sup>, Hai Zheng<sup>2</sup>, Ruoting Zhan<sup>1</sup>, Likai Chen<sup>1\*</sup>

---

Supplementary Materials:

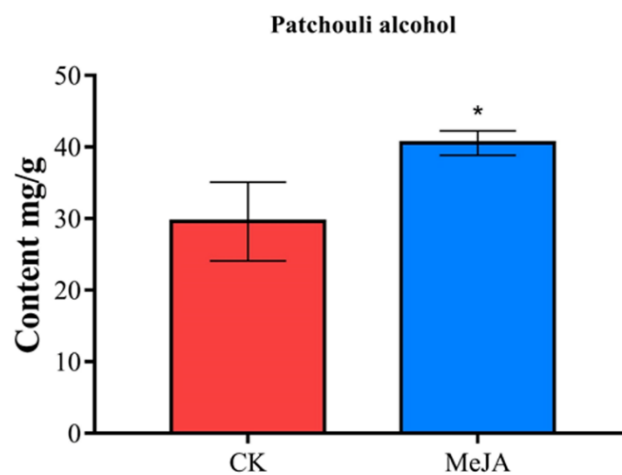

**Figure S1.** MeJA treatment on *P. cablin* leaves can significantly increase the accumulation of patchouli alcohol.

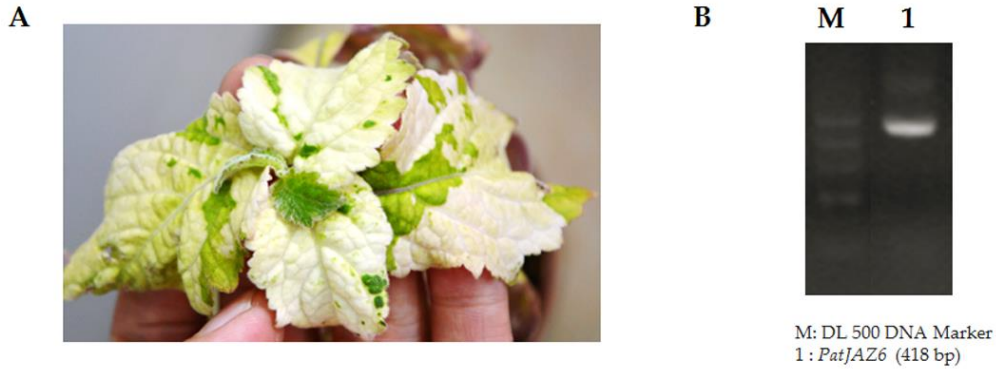

**Figure S2.** (A) Virus induced *PatPDS* silencing in *P. cablin*. (B) Electropherogram of cloning a 418 bp fragment of *Pat*/AZ6 into pTRV2 vector.

**Table S1.** List of primers used in this study.

| Name                          | Sequence 5' - 3'                                |
|-------------------------------|-------------------------------------------------|
| <i>Pat</i> /AZ6-F             | TATGGAGAGAGATTTTCATGGGGT                        |
| <i>Pat</i> /AZ6-R             | TAAATCTGTCTCCTTGGTGACAG                         |
| <i>Pat</i> /AZ6-qPCR-F        | GATCGGTCCGGTGCTAACAA                            |
| <i>Pat</i> /AZ6-qPCR-R        | TCATCACCCCTCTCCTTTCCG                           |
| PAN580- <i>Pat</i> /AZ6-F     | aggacagcccagatcactagtATGGAGAGAGATTTTCATGGGGTT   |
| PAN580- <i>Pat</i> /AZ6-R     | gccttgctcaccatggatccATCTGTCTCCTTGGTGACAGAGAGG   |
| pGBKT7- <i>Pat</i> /AZ6-F     | atggccatggaggccgaattcATGGAGAGAGATTTTCATGGGGTT   |
| pGBKT7- <i>Pat</i> /AZ6-R     | ccgctgcaggtcgacggatccTTAATCTGTCTCCTTGGTGACAGAGA |
| 1300Cluc- <i>Pat</i> /AZ6-F   | tacgcgtcccggggcggtaccATGGAGAGAGATTTTCATGGGGTT   |
| 1300Cluc- <i>Pat</i> /AZ6-R   | atacgaacgaaagctctgcagTTAATCTGTCTCCTTGGTGACAGAGA |
| 1300nLUC- <i>Pat</i> MYC2b1-F | acgggggacgagctcgggtaccATGATCGGTTACCGGACTCCC     |
| 1300nLUC- <i>Pat</i> MYC2b1-R | cgcgtagagatctggtcgacCTATCTACTCTCCCCACCTTGG      |
| 1300nLUC- <i>Pat</i> MYC2b2-F | acgggggacgagctcgggtaccATGATCGGTTACCGGACTCCC     |
| 1300nLUC- <i>Pat</i> MYC2b2-R | cgcgtagagatctggtcgacCTATCTACTCTCCCCACCTTGG      |
| PTRV2- <i>Pat</i> /AZ6-F      | gtgagtaaggttaccgaattcGCAAATCATATCCAAGATGCAAAG   |
| PTRV2- <i>Pat</i> /AZ6-R      | cgtagactcgggtaccggtaccGTAGACCAGGGCTCTGTGGTGG    |
| PJLRBO- <i>Pat</i> /AZ6-F     | ttcgtttctgtcattaattaaATGGAGAGAGATTTTCATGGGGTT   |
| PJLRBO- <i>Pat</i> /AZ6-R     | tcaagttgcaggaccggtccgTTAATCTGTCTCCTTGGTGACAGAGA |
| <i>Pat</i> PTS-qPCR-F         | CCAACCGCGAAACAAGTCC                             |
| <i>Pat</i> PTS-qPCR-R         | ATGCGTATGCTCGTAGAT                              |
